# Supplementary material for: Modelling Bacteria-Inspired Dynamics with Networks of Interacting Chemicals
Source: PubMed Central journal article supplement (PMC6789575; doi:10.3390/life9030063), 2019-07-29
Supplement: life-09-00063-s001.pdf [file life-09-00063-s001.pdf]

# Modelling bacteria-inspired dynamics with networks of interacting chemicals

Tamás Bánsági Jr,<sup>1,2</sup> and Annette F. Taylor<sup>2,\*</sup>

## Supplementary information

The ODE files that were used in case 1 and case 2 are included below. All equations were solved using XPP-AUT with the integration method of cvode.<sup>1</sup> Bifurcation diagrams were produced using the AUTO program in XPP.

### Model 1 .ode file for case 1: cell in a reservoir

#5 variable enzyme hydrolysis with scalings S(units)=KM\*s; H=KE1\*h; N=KM\*n; B=KM\*b; BH=KM\*bh

#rates

R1 = v<sub>max</sub>\*s/((1+l\*Ke<sub>2</sub>/(Ke<sub>1</sub>\*h)+l\*h)\*(1+s))

R2 = k<sub>2r</sub>\*KM\*(sr-s-n)-k<sub>2</sub>\*n\*h\*KM\*Ke<sub>1</sub>

R3 = k<sub>3</sub>\*KM\*bh-k<sub>3r</sub>\*b\*h\*KM\*Ke<sub>1</sub>

#rate equations

s'=-R1/KM+ks\*(sr-s)

n'=R1/KM+R2/KM-kn\*n

h'=(R2/Ke<sub>1</sub>+kh\*(hr-h)+R3/Ke<sub>1</sub>-koh\*(Kw/hr-Kw/h)/(Ke<sub>1</sub>\*Ke<sub>1</sub>))/(1+KW/(h\*h\*Ke<sub>1</sub>\*Ke<sub>1</sub>))

#buffer - remove for bifurcation diagram

b'=R3/kM

bh'=-R3/kM

aux pH=-log(Ke<sub>1</sub>\*h)/log(10)

#parameters

par v<sub>max</sub>=1e-4,KM=0.003,Ke<sub>1</sub>=5e-6,Ke<sub>2</sub>=2e-9,k<sub>2r</sub>=1e-3,k<sub>2</sub>=1e7,Kw=1e-14,k<sub>3</sub>=1, k<sub>3r</sub>=1e7

par l=1

par ks=0.0014,kh=0.008,koh=0.008,kn=0.004,sr=0.1,hr=11

#initial conditions - scaled!

init s=0.1,h=11

#numerical stuff

@ total=5000,dt=0.1,tol=1e-12, atol=1e-8, meth=cvode

@ xplot=t,yplot=pH,xhi=5000,ylo=1,yhi=14

@ maxstor=10000000

Done

## Model 2 .ode file for case 2: Group of identical cells in a fixed volume of solution

#12 variable enzyme hydrolysis with scalings:  $S(\text{units})=KM*s$ ;  $H=KE1*h$ ;  $N=KM*n$ ;  $B=KM*b$ ;  
 $BH=KM*bh$ ;  $Co = KM*co$

#rates in the cells

$$R1 = v_{\max} * s / ((1 + l * k_e / (k_e * h) + l * h) * (1 + s))$$

$$R2 = k_2 * KM * nh - k_{2r} * n * h * KM * Ke1$$

$$R3 = k_3 * KM * bh - k_{3r} * b * h * KM * Ke1$$

#rate equations

$$s' = -R1 / KM + k_s * (s_0 - s)$$

$$n' = R1 / kM + R2 / KM + k_n * (n_0 - n)$$

$$h' = (R2 / Ke1 + R3 / Ke1 + k_h * (h_0 - h) - k_h * (K_w / h_0 - K_w / h)) / (Ke1 * Ke1) / (1 + K_w / (h * h))$$

$$nh' = -R2 / KM + k_n * (n_0 - nh)$$

$$b' = R3 / KM$$

$$bh' = -R3 / KM$$

#rates in the droplet

$$R2_0 = k_2 * KM * n_{h_0} - k_{2r} * n_0 * n_0 * KM * Ke1$$

$$R4_0 = k_c * K_w / (h_0 * Ke1) * c_0 * KM$$

#rate equations

$$s_0' = k_r * (s_r - s_0) + k_s * d * (s - s_0)$$

$$n_0' = R2_0 / KM + k_n * d * (n - n_0)$$

$$h_0' = (k_r * (h_r - h_0) + R2_0 / ke1 + k_h * d * (h - h_0) - k_h * d * (K_w / h - K_w / h_0)) / (Ke1 * Ke1) / (1 + K_w / (h_0 * h_0))$$

$$n_{h_0}' = -R2_0 / kM + k_n * d * (nh - n_{h_0})$$

$$c_0' = -R4_0 / KM$$

$$c_{m_0}' = R4_0 / KM$$

$$\text{aux pH} = -\log(Ke1 * h) / \log(10)$$

$$\text{aux pH}_0 = -\log(Ke1 * h_0) / \log(10)$$

#parameters

$$\text{par } s_r = 0.1, h_r = 15, v_{\max} = 1e-4, KM = 0.003, Ke1 = 5e-6, Ke2 = 2e-9, k_2 = 1e-3, k_{2r} = 1e7, K_w = 1e-14$$

$$\text{par } k_r = 0.001, k_3 = 1, k_{3r} = 1e7, k_c = 100$$

$$\text{par } l = 1, d = 0.07$$

$$\text{par } k_s = 0.0014, k_h = 0.008, k_n = 0.004$$

#initial conditions - scaled!

$$\text{init } s = 0.1, h = 15, h_0 = 15, s_0 = 0.1, bh = 0.01, c_0 = 1$$

#numerical stuff

$$\text{@ total} = 5000, dt = 1, tol = 1e-12, atol = 1e-8, \text{meth} = \text{cvode}$$

$$\text{@ xplot} = t, \text{yplot} = \text{pH}, x_{hi} = 5000, y_{lo} = 1, y_{hi} = 14$$

$$\text{@ maxstor} = 10000000, \text{bounds} = 10000$$

done

1. B. Ermentrout, *Simulating, Analyzing, and Animating Dynamical Systems*. (Society for Industrial and Applied Mathematics, 2002).
